# Supplementary material for: Outcomes in Clinical Trials of Inhaled Corticosteroids for Children with Asthma Are Narrowly Focussed on Short Term Disease Activity
Source: PubMed Central journal article supplement (PMC2707602; doi:10.1371/journal.pone.0006276), 2009-07-17
Supplement: pone.0006276.s001.pdf [file pone.0006276.s001.pdf]

Supplementary File S1 – search strategy

- #1 asthma:ti,ab,kw
- #2 (antiasthma OR anti-asthma):ti,ab,kw
- #3 wheez\*:ti,ab,kw
- #4 (bronch?spas\* OR bronchoconstric\* OR bronchismus OR bronchiospas\*):ti,ab,kw
- #5 cough:ti,ab,kw
- #6 (#1 OR #2 OR #3 OR #4 OR #5)
- #7 (child\*):ti,ab,kw
- #8 (paediatric\* OR pediatric):ti,ab,kw
- #9 (infan\*):ti,ab,kw
- #10 (young\*):ti,ab,kw
- #11 (toddler\*):ti,ab,kw
- #12 bab\*:ti,ab,kw
- #13 (preschool or pre-school):ti,ab,kw
- #14 (teenage\*):ti,ab,kw
- #15 (adolesce\*):ti,ab,kw
- #16 (#7 OR #8 OR #9 OR #10 OR #11 OR #12 OR #13 OR #14 OR #15)
- #17 beclomet?asone:ti,ab,kw
- #18 betamet?asone:ti,ab,kw
- #19 fluticasone:ti,ab,kw
- #20 budesonide:ti,ab,kw
- #21 (corticosteroid\* OR \*corticoid\*):ti,ab,kw
- #22 (inhaled \*steroid\*):ti,ab,kw
- #23 (pulmicort or azmacort or becoride or flixotide or flovent or aerobid or aerobec or qvar or vanceril or triamciclone):ti,ab,kw
- #24 (#17 OR #18 OR #19 OR #20 OR #21 OR #22 OR #23)
- #25 (#6 AND #16 AND #24)
